# Supplementary material
Source: PubMed Central journal article supplement (PMC3811565)
Supplement: EC.00061-13_zek999094128so1.pdf [file EC.00061-13_zek999094128so1.pdf]

**Table S1** Sporulation of *sybI-SI* at various temperatures.

|                | sporulation rate (%) |      |      |      |      |      |
|----------------|----------------------|------|------|------|------|------|
|                | 23°C                 | 25°C | 28°C | 30°C | 32°C | 34°C |
| Wild type      | 100                  | 99.1 | 99.2 | 100  | 98.6 | N.T. |
| <i>sybI-SI</i> | 92.3                 | 94.5 | 90.6 | 93.0 | 91.9 | N.T. |

Wild-type (TY235) and *sybI-SI* (TY234) strains were incubated on MEA at various temperatures. For each sample, >100 cells were counted.

N.T., not tested because the mating was completely inhibited at 34°C.

**Table S2** Spore size of *sybI-SI* at various temperatures

|                | Long axis of spores ( $\mu\text{m}$ ) at |                 |                 |                 |                 |      |
|----------------|------------------------------------------|-----------------|-----------------|-----------------|-----------------|------|
|                | 23°C                                     | 25°C            | 28°C            | 30°C            | 32°C            | 34°C |
| Wild type      | 3.56 $\pm$ 0.36                          | 3.52 $\pm$ 0.44 | 3.40 $\pm$ 0.29 | 3.57 $\pm$ 0.50 | 3.42 $\pm$ 0.46 | N.T. |
| <i>sybI-SI</i> | 2.66 $\pm$ 0.34                          | 2.61 $\pm$ 0.31 | 2.71 $\pm$ 0.30 | 2.75 $\pm$ 0.44 | 2.76 $\pm$ 0.43 | N.T. |

Wild-type (TY235) and *sybI-SI* (TY234) strains were incubated on MEA at various temperatures.

The mean values with standard deviations are presented (n > 50).

N.T., note tested because the mating was completely inhibited at 34°C.

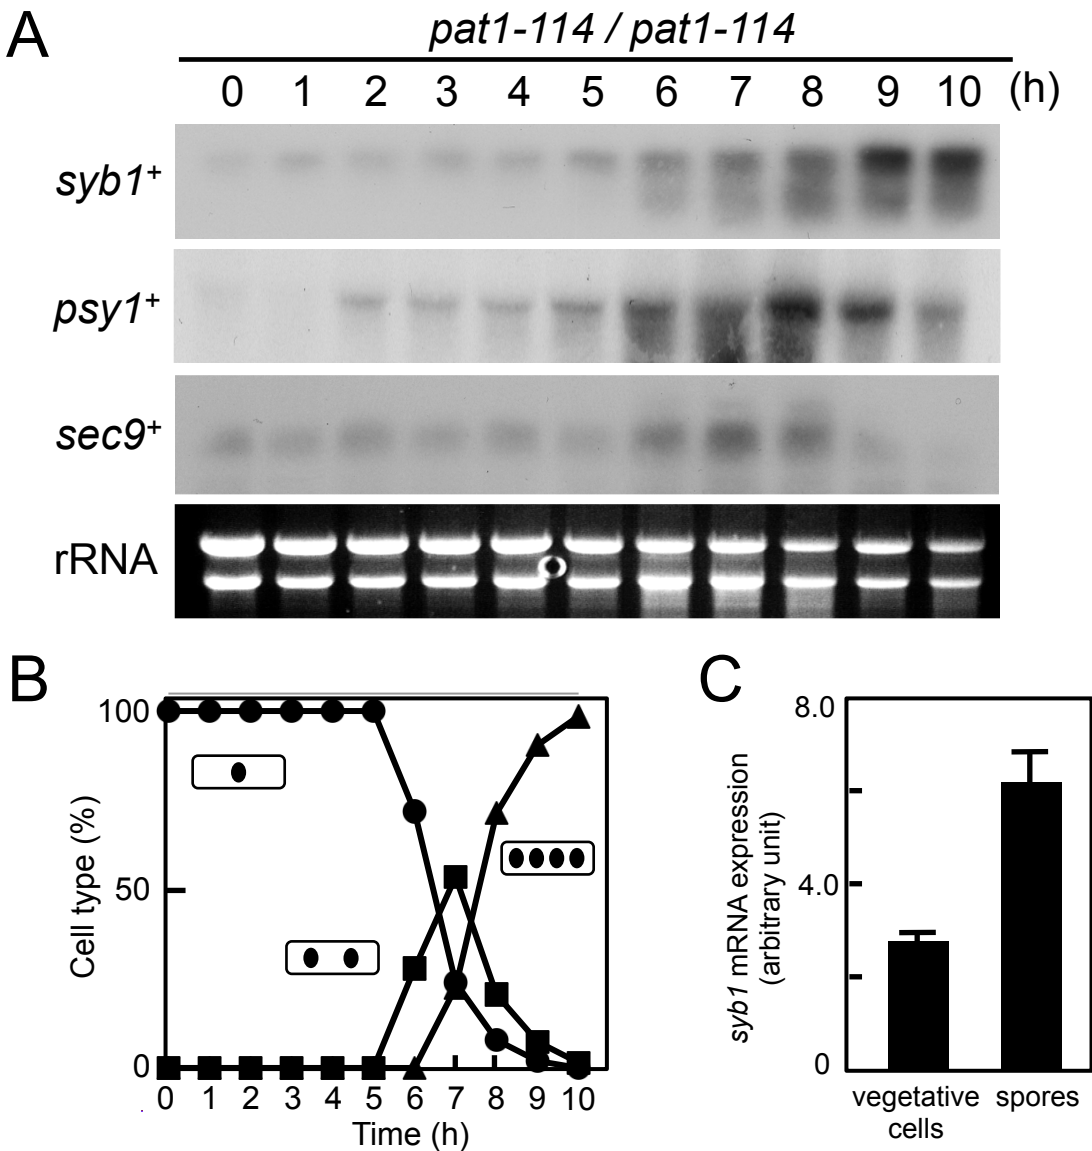

Fig. S1. Transcription of *syb1*<sup>+</sup> in *pat1*-driven synchronous meiosis. (A) Meiosis of diploid strains harboring homozygous *pat1-114* (JZ670) was synchronous. At hourly intervals, total RNA was prepared and blotted with a radiolabeled *syb1*<sup>+</sup> or *sec9*<sup>+</sup> DNA fragment. (B) Meiotic nuclear division of (A) was monitored by counting the number of nuclei per cell. Circles, mononucleate; squares, binucleate; triangles, tetranucleate cells. (C) RT-qPCR analysis of *syb1* in vegetative cells and spores. Total RNA was prepared from vegetative growing cells and gradient-purified spores of the wild-type strain (MKW5). 0.5  $\mu$ g of total RNA was used for RT-qPCR analysis. A reverse transcriptional reaction was performed using a High Capacity cDNA Reverse Transcription Kit (Applied biosystems, Foster city, CA). The qPCR reaction was set up with a GoTaq(R) qPCR Master Mix (Promega, Madison, WI). The reactions and analyses were carried out with a 7500 Real Time PCR system (Applied biosystems). To amplify the *syb1* cDNA, the primers *syb1*-F (5' CCTTCTGCAGCTGTTCGTAGTG) and *syb1*-R (5' CTGAATTGCAGCTGTCTTCATATTC) were used. To amplify the *act1* cDNA, the primers *act1*-F (5' TGTGACTGAGGCTCCTTTGAA) and *act1*-R (5' GGTGCATTAAGGTTTCGAAAATAA) were used. The *syb1* expression level was normalized against *act1* expression level.

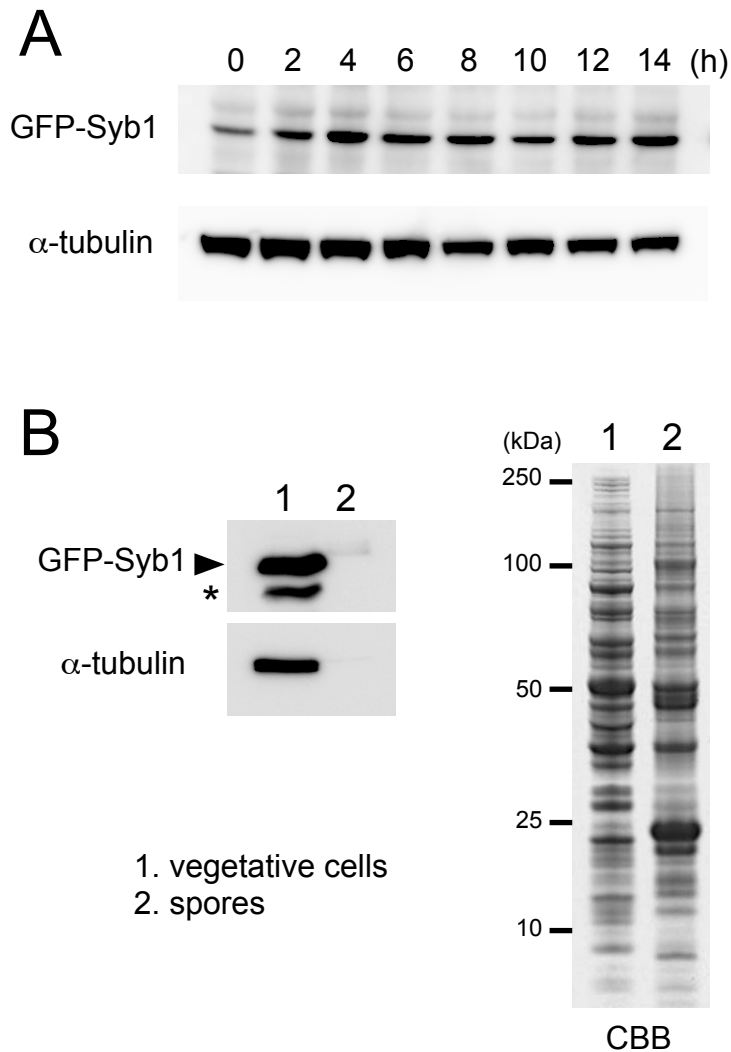

Fig. S2. Changes in the abundance of Syb1 during sporulation. (A) Cells expressing GFP-Syb1 (TY149) were allowed to proceed through synchronous meiosis. Aliquots were removed every 2 hr, and the protein extracts were subjected to Western blot analysis with mouse anti-GFP antibody.  $\alpha$ -tubulin was used as a loading control. (B) Abundance of GFP-Syb1 in spores. Protein extracts from vegetative growing cells and gradient-purified spores of the wild-type (TY1) strain were subjected to Western blot analysis with mouse anti-GFP and anti- $\alpha$ -tubulin antibodies. The band indicated by an asterisk is presumed to be a degradation product of Syb1. The extracts were also analyzed by SDS-PAGE, and the gel was stained with Coomassie brilliant blue (CBB).

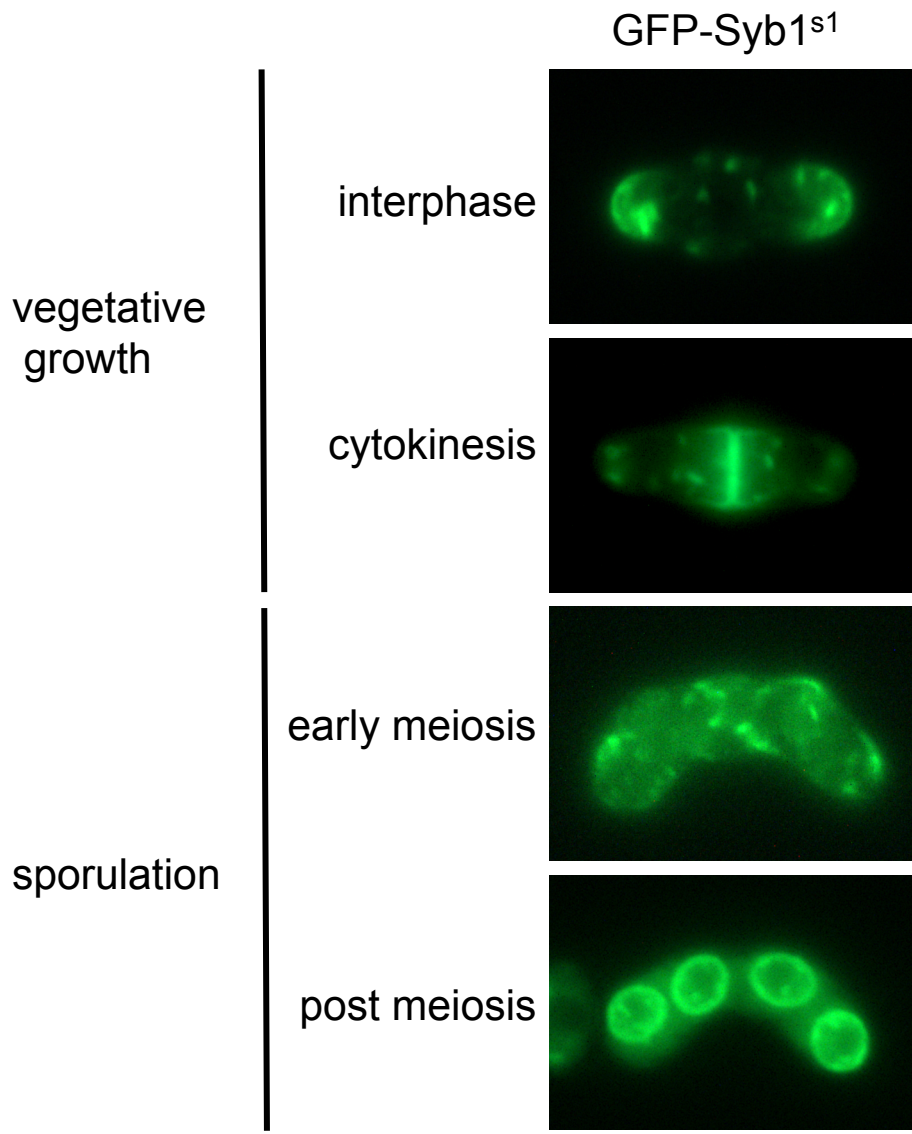

Fig. S3. Localization of Syb1<sup>s1</sup> protein. TY227 expressing Syb1<sup>s1</sup>-GFP was incubated in MM+N (vegetative growth) and sporulated in MM-N medium (sporulation). Bar, 10  $\mu$ m

## **Supplementary Movie Legends**

Movie S1. Behavior of GFP-Syb1 and mCherry-Psy1 during mitotic interphase. The movie essentially corresponds to the frames shown in Fig. 3A. The movie plays at 10 frames per second.

Movie S2. Behavior of GFP-Syb1 and mCherry-Psy1 during mitotic M-phase. The movie essentially corresponds to the frames shown in Fig. 3B. The movie plays at 10 frames per second.

Movie S3. Behavior of GFP-Syb1 and mCherry-Psy1 during meiotic interphase. The movie essentially corresponds to the frames shown in Fig. 3C. The movie plays at 10 frames per second.

Movie S4. Behavior of GFP-Syb1 and mCherry-Psy1 during FSM formation. The movie plays at 10 frames per second.
